# Supplementary material
Source: MDPI journal article supplement (https://www.mdpi.com/2079-6412/13/7/1278)
Supplement: s1 [file s1]

## Supporting Information

# Development of Resonant Cavity Film for 575 nm All-solid-state Laser System

Han Zhu <sup>1,†</sup>, Yawu Xin <sup>1,†</sup>, Yunru Chen <sup>1,†</sup>, Shihui Ma <sup>1</sup>, Yuxia Zhang <sup>2</sup>, Yongchao Peng <sup>1</sup>, Yixin Lin <sup>1</sup>, Shifu Xiong <sup>1,\*</sup> and Zhanggui Hu <sup>1</sup>

<sup>1</sup> Tianjin Key Laboratory of Functional Crystal Materials, Institute of Functional Crystals, Tianjin University of Technology, Tianjin 300384, China; zh\_optics@stud.tjut.edu.cn (H.Z.); xyw\_optics@stud.tjut.edu.cn (Y.X.); wins\_echo@163.com (Y.C.); shihuima@email.tjut.edu.cn (S.M.); pycoptical@stud.tjut.edu.cn (Y.P.); linyixin@stud.tjut.edu.cn (Y.L.); hu@mail.ipc.ac.cn (Z.H.)

<sup>2</sup> College of Physics, Qingdao University, Qingdao 266071, China; yuxiazhang@qdu.edu.cn

\* Correspondence: xsf\_optics@email.tjut.edu.cn

† These authors contributed equally to this work.

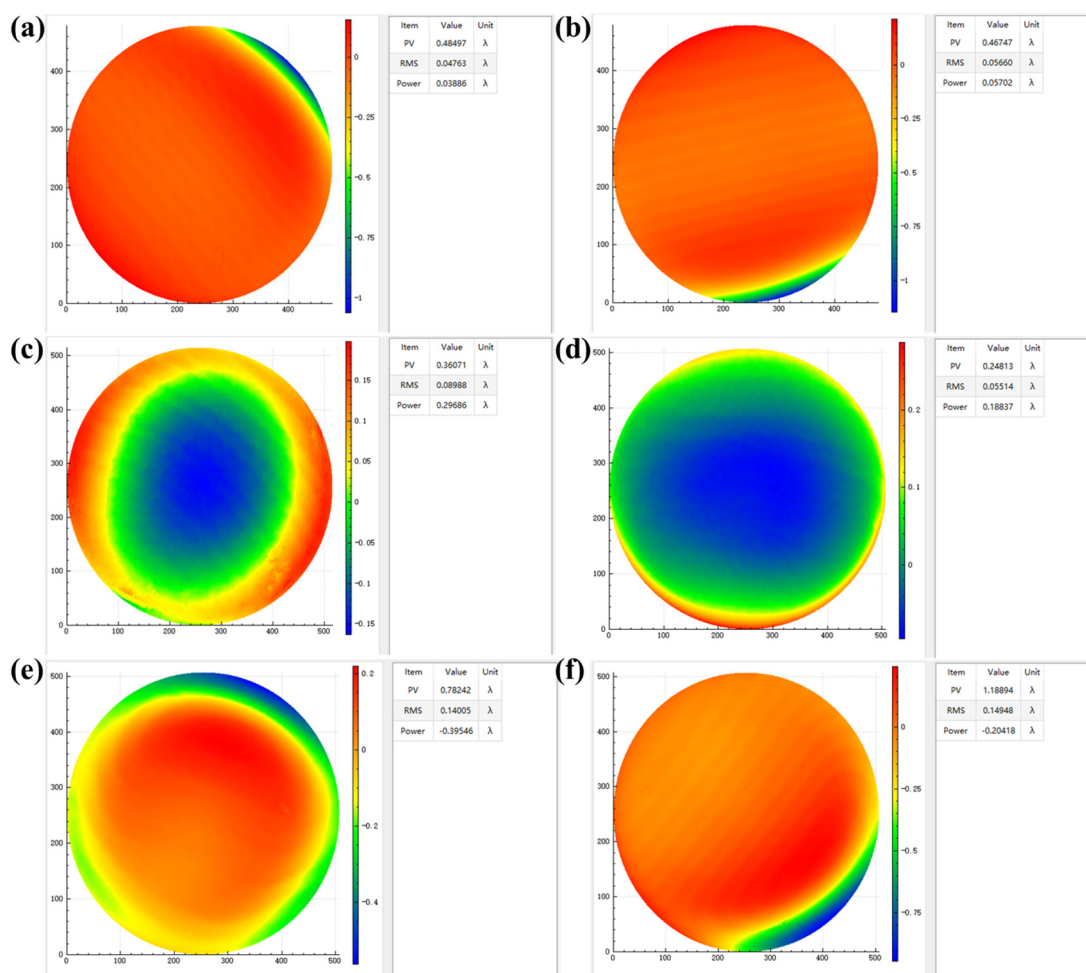

**Figure S1.** Surface shape test of coated BK7 substrate at different temperatures and uncoated BK7 substrate (a) BK7; (b) 120 °C; (c) 150 °C; (d) 180 °C; (e) 210 °C; (f) 240 °C.

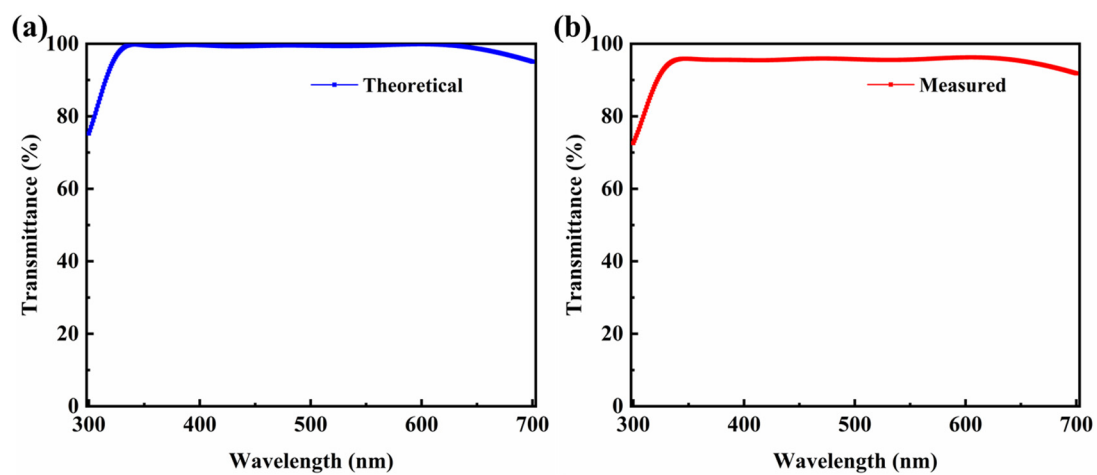

**Figure S2.** (a) Theoretical and (b) measured transmittance curve of antireflective film (when the second surface was not coated, the substrate/air interface reflectance was 3.7% @550 nm).

**Table S1.** Output wavelength and output power of each yellow laser band obtained from previous studies and this work.

| <b>Laser crystals</b>         | Nd:YAG | LiB <sub>3</sub> O <sub>5</sub> | Nd:YVO <sub>4</sub> | Nd:YVO <sub>4</sub> | Diamond | Nd:YVO <sub>4</sub> | Dy,Tb:LuLiF <sub>4</sub> |
|-------------------------------|--------|---------------------------------|---------------------|---------------------|---------|---------------------|--------------------------|
| <b>Output wavelength (nm)</b> | 561    | 578                             | 579.5               | 588                 | 572.5   | 559/588             | 575                      |
| <b>Output power (W)</b>       | 60.3   | 0.0375                          | 6.8                 | 13.7                | 9.2     | 6.54/5.12           | 0.106                    |
| <b>Year of publication</b>    | 2012   | 2016                            | 2020                | 2020                | 2021    | 2021                | this work                |

The variation of the substrate temperature of the ion source affects the denseness of the film, which further leads to the variation of the refractive index of the film. The denseness of a film is expressed in the optical field by the aggregation density. It is reported that the film layers of optical films almost always have a significant columnar structure, which runs across the film and is perpendicular to the interface. The aggregation density is defined as the ratio of the volume of the solid column to the volume of the film, with values typically in the range of 0.75 to 1.0. The refractive index of the film is a function of the aggregation density and the simplest linear approximation is given by the Equation (S1).

$$n_f = pn_s + (1 - p)n_v \quad (S1)$$

Where  $n_f$  is the refractive index of the material in solid state,  $p$  is the aggregation density,  $n_s$  is the refractive index of the material in the solid state, and for HfO<sub>2</sub>,  $n_s$ = 2.1 at 575 nm,  $n_v$  is the refractive index of air,  $n_v$ = 1.

It can be seen that the aggregation density of the film at different temperature follows the relationship of Formula (S2).

$$p = \frac{n_f - n_v}{n_s - n_v} \quad (S2)$$

The aggregation density is calculated according to Formula (2), and the results are shown in Table S2.

**Table S2.** Refractive index and packing density of HfO<sub>2</sub> films under different temperature.

| Temperature /°C | Refractive index@575 nm | Packing density |
|-----------------|-------------------------|-----------------|
| 120             | 2.039                   | 0.945           |
| 150             | 2.049                   | 0.954           |
| 180             | 2.061                   | 0.965           |
| 210             | 2.080                   | 0.982           |
| 240             | 2.078                   | 0.980           |

**Table S3.** Each film layer physical thickness of resonant cavity film A.

| Number | Materials        | Physical thickness(nm) | Number | Materials        | Physical thickness(nm) |
|--------|------------------|------------------------|--------|------------------|------------------------|
| 1      | HfO <sub>2</sub> | 86.88                  | 26     | SiO <sub>2</sub> | 100.47                 |
| 2      | SiO <sub>2</sub> | 86.58                  | 27     | HfO <sub>2</sub> | 71.09                  |
| 3      | HfO <sub>2</sub> | 83.62                  | 28     | SiO <sub>2</sub> | 89.19                  |
| 4      | SiO <sub>2</sub> | 63.15                  | 29     | HfO <sub>2</sub> | 77.63                  |
| 5      | HfO <sub>2</sub> | 82.77                  | 30     | SiO <sub>2</sub> | 85.11                  |
| 6      | SiO <sub>2</sub> | 80.54                  | 31     | HfO <sub>2</sub> | 80.43                  |
| 7      | HfO <sub>2</sub> | 68.80                  | 32     | SiO <sub>2</sub> | 88.86                  |
| 8      | SiO <sub>2</sub> | 107.04                 | 33     | HfO <sub>2</sub> | 80.61                  |
| 9      | HfO <sub>2</sub> | 45.64                  | 34     | SiO <sub>2</sub> | 90.71                  |
| 10     | SiO <sub>2</sub> | 122.96                 | 35     | HfO <sub>2</sub> | 79.20                  |
| 11     | HfO <sub>2</sub> | 47.52                  | 36     | SiO <sub>2</sub> | 91.66                  |
| 12     | SiO <sub>2</sub> | 135.64                 | 37     | HfO <sub>2</sub> | 77.82                  |
| 13     | HfO <sub>2</sub> | 17.25                  | 38     | SiO <sub>2</sub> | 102.51                 |
| 14     | SiO <sub>2</sub> | 135.65                 | 39     | HfO <sub>2</sub> | 91.33                  |
| 15     | HfO <sub>2</sub> | 16.97                  | 40     | SiO <sub>2</sub> | 138.91                 |
| 16     | SiO <sub>2</sub> | 133.71                 | 41     | HfO <sub>2</sub> | 78.52                  |
| 17     | HfO <sub>2</sub> | 59.02                  | 42     | SiO <sub>2</sub> | 109.94                 |
| 18     | SiO <sub>2</sub> | 118.16                 | 43     | HfO <sub>2</sub> | 60.29                  |
| 19     | HfO <sub>2</sub> | 56.07                  | 44     | SiO <sub>2</sub> | 117.62                 |
| 20     | SiO <sub>2</sub> | 119.74                 | 45     | HfO <sub>2</sub> | 46.85                  |
| 21     | HfO <sub>2</sub> | 60.23                  | 46     | SiO <sub>2</sub> | 122.53                 |
| 22     | SiO <sub>2</sub> | 117.20                 | 47     | HfO <sub>2</sub> | 52.13                  |
| 23     | HfO <sub>2</sub> | 60.75                  | 48     | SiO <sub>2</sub> | 121.43                 |
| 24     | SiO <sub>2</sub> | 110.94                 | 49     | HfO <sub>2</sub> | 52.24                  |
| 25     | HfO <sub>2</sub> | 63.74                  | 50     | SiO <sub>2</sub> | 60.62                  |

**Table S4.** Each film layer physical thickness of resonant cavity film B.

| Number | Materials        | Physical thickness(nm) | Number | Materials        | Physical thickness(nm) |
|--------|------------------|------------------------|--------|------------------|------------------------|
| 1      | HfO <sub>2</sub> | 40.49                  | 37     | HfO <sub>2</sub> | 53.33                  |
| 2      | SiO <sub>2</sub> | 55.78                  | 38     | SiO <sub>2</sub> | 66.55                  |
| 3      | HfO <sub>2</sub> | 42.41                  | 39     | HfO <sub>2</sub> | 43.91                  |
| 4      | SiO <sub>2</sub> | 65.39                  | 40     | SiO <sub>2</sub> | 69.90                  |
| 5      | HfO <sub>2</sub> | 44.37                  | 41     | HfO <sub>2</sub> | 58.57                  |
| 6      | SiO <sub>2</sub> | 57.09                  | 42     | SiO <sub>2</sub> | 81.79                  |
| 7      | HfO <sub>2</sub> | 36.46                  | 43     | HfO <sub>2</sub> | 55.02                  |
| 8      | SiO <sub>2</sub> | 59.99                  | 44     | SiO <sub>2</sub> | 80.21                  |
| 9      | HfO <sub>2</sub> | 44.12                  | 45     | HfO <sub>2</sub> | 66.86                  |
| 10     | SiO <sub>2</sub> | 60.43                  | 46     | SiO <sub>2</sub> | 85.28                  |
| 11     | HfO <sub>2</sub> | 37.31                  | 47     | HfO <sub>2</sub> | 53.55                  |
| 12     | SiO <sub>2</sub> | 57.01                  | 48     | SiO <sub>2</sub> | 82.05                  |
| 13     | HfO <sub>2</sub> | 43.32                  | 49     | HfO <sub>2</sub> | 62.67                  |
| 14     | SiO <sub>2</sub> | 60.70                  | 50     | SiO <sub>2</sub> | 79.74                  |
| 15     | HfO <sub>2</sub> | 36.04                  | 51     | HfO <sub>2</sub> | 57.30                  |
| 16     | SiO <sub>2</sub> | 54.77                  | 52     | SiO <sub>2</sub> | 94.48                  |
| 17     | HfO <sub>2</sub> | 44.20                  | 53     | HfO <sub>2</sub> | 68.84                  |
| 18     | SiO <sub>2</sub> | 67.06                  | 54     | SiO <sub>2</sub> | 113.50                 |
| 19     | HfO <sub>2</sub> | 45.16                  | 55     | HfO <sub>2</sub> | 68.47                  |
| 20     | SiO <sub>2</sub> | 59.62                  | 56     | SiO <sub>2</sub> | 90.89                  |
| 21     | HfO <sub>2</sub> | 38.34                  | 57     | HfO <sub>2</sub> | 76.24                  |
| 22     | SiO <sub>2</sub> | 59.85                  | 58     | SiO <sub>2</sub> | 106.55                 |
| 23     | HfO <sub>2</sub> | 150.18                 | 59     | HfO <sub>2</sub> | 71.81                  |
| 24     | SiO <sub>2</sub> | 73.50                  | 60     | SiO <sub>2</sub> | 87.36                  |
| 25     | HfO <sub>2</sub> | 47.42                  | 61     | HfO <sub>2</sub> | 68.41                  |
| 26     | SiO <sub>2</sub> | 66.68                  | 62     | SiO <sub>2</sub> | 97.69                  |
| 27     | HfO <sub>2</sub> | 45.81                  | 63     | HfO <sub>2</sub> | 69.32                  |
| 28     | SiO <sub>2</sub> | 67.82                  | 64     | SiO <sub>2</sub> | 104.74                 |
| 29     | HfO <sub>2</sub> | 51.52                  | 65     | HfO <sub>2</sub> | 63.90                  |
| 30     | SiO <sub>2</sub> | 79.94                  | 66     | SiO <sub>2</sub> | 111.22                 |
| 31     | HfO <sub>2</sub> | 53.67                  | 67     | HfO <sub>2</sub> | 78.98                  |
| 32     | SiO <sub>2</sub> | 73.00                  | 68     | SiO <sub>2</sub> | 124.94                 |
| 33     | HfO <sub>2</sub> | 49.52                  | 69     | HfO <sub>2</sub> | 99.56                  |
| 34     | SiO <sub>2</sub> | 71.73                  | 70     | SiO <sub>2</sub> | 80.31                  |
| 35     | HfO <sub>2</sub> | 52.98                  | 71     | HfO <sub>2</sub> | 79.00                  |
| 36     | SiO <sub>2</sub> | 81.14                  |        |                  |                        |
